# Supplementary material for: Highly Efficient Flexible Polymer Solar Cells with Robust Mechanical Stability
Source: PubMed Central journal article supplement (PMC6446608; doi:10.1002/advs.201801180), 2019-02-07
Supplement: ADVS-6-1801180-s002.pdf [file ADVS-6-1801180-s002.pdf]

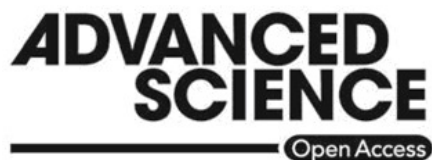

## Supporting Information

for *Adv. Sci.*, DOI: 10.1002/advs.201801180

Highly Efficient Flexible Polymer Solar Cells with Robust Mechanical Stability

*Licheng Tan, Yilin Wang, Jingwen Zhang, Shuqin Xiao, Huanyu Zhou, Yaowen Li,\* Yiwang Chen,\* and Yongfang Li*

## Supporting Information

### Highly Efficient Flexible Polymer Solar Cells with Robust Mechanical Stability

Licheng Tan<sup>1,2</sup>, Yilin Wang<sup>1</sup>, Jingwen Zhang<sup>3</sup>, Shuqin Xiao<sup>1,2</sup>, Huanyu Zhou<sup>1</sup>, Yaowen Li\*<sup>3</sup>, Yiwang Chen\*<sup>1,2</sup>, Yongfang Li<sup>3</sup>

<sup>1</sup>College of Chemistry, Nanchang University, 999 Xuefu Avenue, Nanchang 330031, China

<sup>2</sup>Institute of Polymers and Energy Chemistry, Nanchang University, 999 Xuefu Avenue, Nanchang 330031, China

<sup>3</sup>Laboratory of Advanced Optoelectronic Materials, College of Chemistry, Chemical Engineering and Materials Science, Soochow University, 199 Ren'ai Road, Suzhou 215123, China

Corresponding author. Tel.: +86 791 83968703; fax: +86 791 83969561. E-mail: ywchen@ncu.edu.cn (Y.W.C.), ywli@suda.edu.cn (Y.W.L.). Licheng Tan and Yilin Wang contributed equally.

## Experimental Section

**Materials and reagents:** Patterned ITO glass substrates (sheet resistance  $\leq 10 \Omega/\text{sq}$ ; transmittance  $\geq 84\%$ ) were purchased from Zhuhai Kaivo Optoelectronic Technology Co. Ltd. PTB7-Th, PBDB-T and ITIC were purchased from 1-material, Chemscitech Inc., QC, Canada. PC<sub>71</sub>BM was purchased from Solarmer Materials Inc., China. Chlorobenzene (CB) and 1,8-diiodooctane (DIO) were obtained from Sigma-Aldrich. All available chemical reagents were used as received without any further purification.

**Preparation of PDA solution.** 0.09 g tris hydrochloride and 0.17 g trometamol were added into the 200 mL deionized water to prepare tris buffer. Then, 3-hydroxytyramine hydrochloride (J&K chemical) was dissolved in the tris buffer (pH 8.5). The dopamine monomer was self-aggregated at 25 °C.

**Preparation of AZO and AZO:PDA.** The general procedure for the preparation of AZO solution according to the published literature.<sup>[1]</sup> In details, 2.195 g zinc acetate dihydrate ( $\text{Zn}(\text{CH}_3\text{COO})_2 \cdot 2\text{H}_2\text{O}$ , Aldrich, 98%) and doping source of 0.038 g aluminum nitrate ( $\text{Al}(\text{NO}_3)_3 \cdot 9\text{H}_2\text{O}$ , Aladdin 99.99%) were added into anhydrous ethanol (25 mL) in a round-bottom flask. After stirring for 10 min at 80 °C, 0.61 mL ethanolamine (EA, Aladdin, 99.5%) was injected into the turbid reaction solution and the ratio of EA to  $\text{Zn}(\text{CH}_3\text{COO})_2 \cdot 2\text{H}_2\text{O}$  was retained at 1.0. It is worth noting that the suspension dissolved with the addition of EA gradually. Transparent AZO solution was obtained after 2 h stir and reflux at 80 °C. For AZO:PDA hybrid solutions, 10 mg/mL PDA was added into the AZO solution with different molar fraction (1.0%, 1.5% and 2.0%). Desired concentration was obtained by diluting the AZO solution with anhydrous ethanol when used.

**Device preparation.** The inverted solar cells studied in this work are based on the following layer sequence: ITO/AZO ETLs/active layer/ $\text{MoO}_3/\text{Ag}$  (or Al). For flexible device, the device structure is PET/Ag-mesh/PH1000/PEIE/ETLs/active

layer/MoO<sub>3</sub>/Al. The treated substrates were dried with a flowing nitrogen stream and further treated by atmospheric plasma treatment for 3 min. After that, AZO and AZO:PDA solutions were spin-coated onto the ITO substrates as ETLs and annealed in air at 140 °C for 20 min. Then active layer was deposited by spin-coating from a PBDB-T-2F:IT-4F (10:10 wt%, 20 mg/mL) solution in mixed solvents of CB:DIO (99.0:1.0 vol%) under 1600 rpm for 60 s dried on a hot plate at 100 °C for 15 min. For PBDB-T:ITIC system, the active layer was deposited by spin-coating from a PBDB-T:ITIC (10:10 wt%, 20 mg/mL) solution in mixed solvents of CB:DIO (99.5:0.5 vol%) under 2500 rpm for 60 s. For PTB7-Th:PC<sub>71</sub>BM system, the active layer was deposited by spin-coating from a PTB7-Th:PC<sub>71</sub>BM (6:9 wt%, 15 mg/mL) solution in mixed solvent of CB:DIO (97.0:3.0 vol%). Finally, MoO<sub>3</sub> and Ag (or Al) were deposited on top of the active layer by thermal evaporation in a high vacuum ( $< 1 \times 10^{-6}$  Torr). For flexible device, the PEDOT layer (AI4083) was spin-coated onto PET/Ag-mesh electrode in ambient air and dried on a hot plate at 120 °C for 20 min. Then, PEIE is deposited on the PEDOT layer under 5000 rpm for 60 s.

**Characterizations and device measurement.** UV-Vis absorption and transmission spectra of AZO and AZO:PDA were taken with a Lambda 750 UV-Vis spectrometer. PL spectra of AZO and AZO:PDA were carried on a Hitachi F-7000 photoluminescence spectroscopy with a xenon lamp as the light source. The Philips X'Pert Pro MPD with Cu K $\alpha$  radiation ( $\lambda = 1.54056 \text{ \AA}$ ) was applied to gather XRD patterns under a scanning rate of 2 °/min. SEM images were taken by FEI XL30 Sirion SEM. Fourier transform infrared (FTIR) spectra were recorded on a Shimadzu IRPrestige-21 spectrometer. The surface morphologies of AZO and AZO:PDA were characterized by AFM (Digital Instrument Nanoscope 31). XPS was executed by employing a Kratos AXIS Ultra. UPS was carried out by the AXISULTRA DLD spectrometer (Kratos Analytical Ltd.). For the UPS measurements, He I (21.22 eV) radiation line from a discharge lamp was used, with an experimental resolution of 0.15 eV. All UPS measurements of the onset of photoemission for determining the work function were done using standard procedures with a -5 V bias applied to the

sample. J-V characteristics were tested using a Keithley 2400 sourcemeter under AM 1.5 G solar spectra illumination (100 mW/cm<sup>2</sup>, Abet Solar simulator Sun2000). IPCE values were measured under monochromatic illumination (Oriel Cornerstone 260 1/4 m monochromator equipped with an Oriel 70613NS QTH lamp), and the calibration of the incident light was performed using a monocrystalline silicon diode. Mechanical bending test was measured by a stepper motor controller (CL-01A). For peeling test, we apply a force of 0.5 MPa to the 3M tape and active layer by tableting machine. Subsequently, the sample is putted on the universal testing machine (WOTEI-20) for peeling test (2 N peeling force, 50 mm/min peeling speed and 180° peeling direction).

### **Energies level of ultraviolet photoelectron spectroscopy (UPS)**

The lowest unoccupied molecular orbital (LUMO) energies were determined according to the equation:<sup>[2,3]</sup>

$$E_{\text{LUMO}} = h\nu - (E_{\text{cutoff}} - E_{\text{onset}}^{\text{HOMO}})$$

where  $h\nu$  is the incident photon energy ( $h\nu = 21.2$  eV). As shown in **Figure S4**, the left panel is the  $E_{\text{cutoff}}$  gained from the high binding energy cutoff of a spectrum, and the right panel provides  $E_{\text{onset}}^{\text{HOMO}}$ , which is the onset relative to the Fermi level of Au (at 0 eV).

### **Space-charge-limited-current (SCLC) mobility measurement**

In order to characterize the carrier mobility of modified device, electron-only devices with configuration of ITO/AZO ETLs/PBDB-T:ITIC/Al were fabricated. The carrier mobility was measured using the Mott-Gurney SCLC model at low voltage which is described by the following equation:<sup>[4]</sup>

$$J = (9/8) \mu_e \varepsilon_0 \varepsilon_r (V^2/L^3)$$

where  $J$  is the current density,  $\mu_e$  is the effective charge carrier mobility which includes the effect of injection efficiency or traps,  $\varepsilon_0$  is the permittivity of free-space,  $\varepsilon_r$  is the relative dielectric constant,  $V$  is the applied voltage, and  $L$  is the thickness of ETLs and active layers.

## References

1. X. H. Liu, X. D. Li, Y. R. Li, C. J. Song, L. P. Zhu, W. J. Zhang, H. Q. Wang, J. F. Fang, *Adv. Mater.* **2016**, 28, 7405.
2. J. H. Seo, R. Q. Yang, J. Z. Brzezinski, B. Walker, G. C. Bazan, T. Q. Nguyen, *Adv. Mater.* **2009**, 21, 1006.
3. S. Braun, W. R. Salaneck, M. Fahlman, *Adv. Mater.* **2009**, 21, 1450.
4. H. Y. Park, D. Lim, K. D. Kim, S. Y. Jang, *J. Mater. Chem. A* **2013**, 1, 6327.

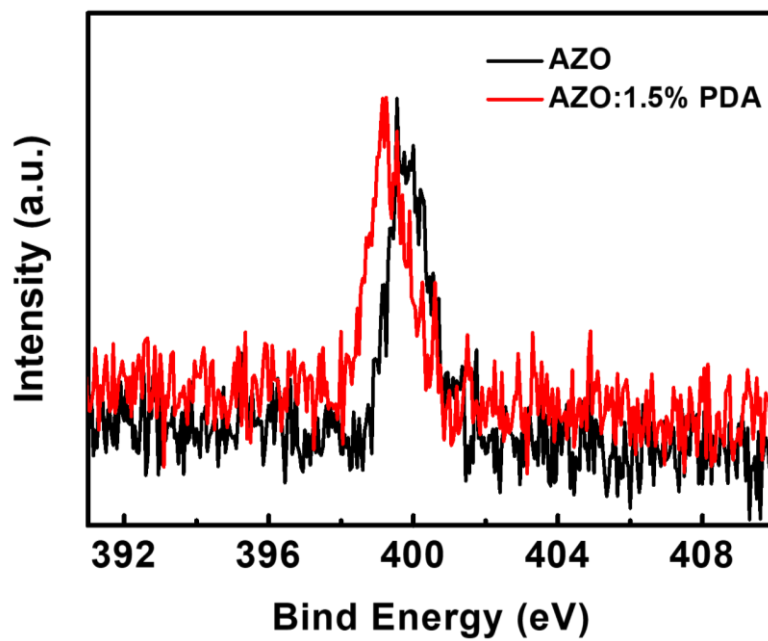

**Figure S1.** N 1s X-ray photoelectron spectroscopy (XPS) spectra of AZO and AZO:1.5%PDA.

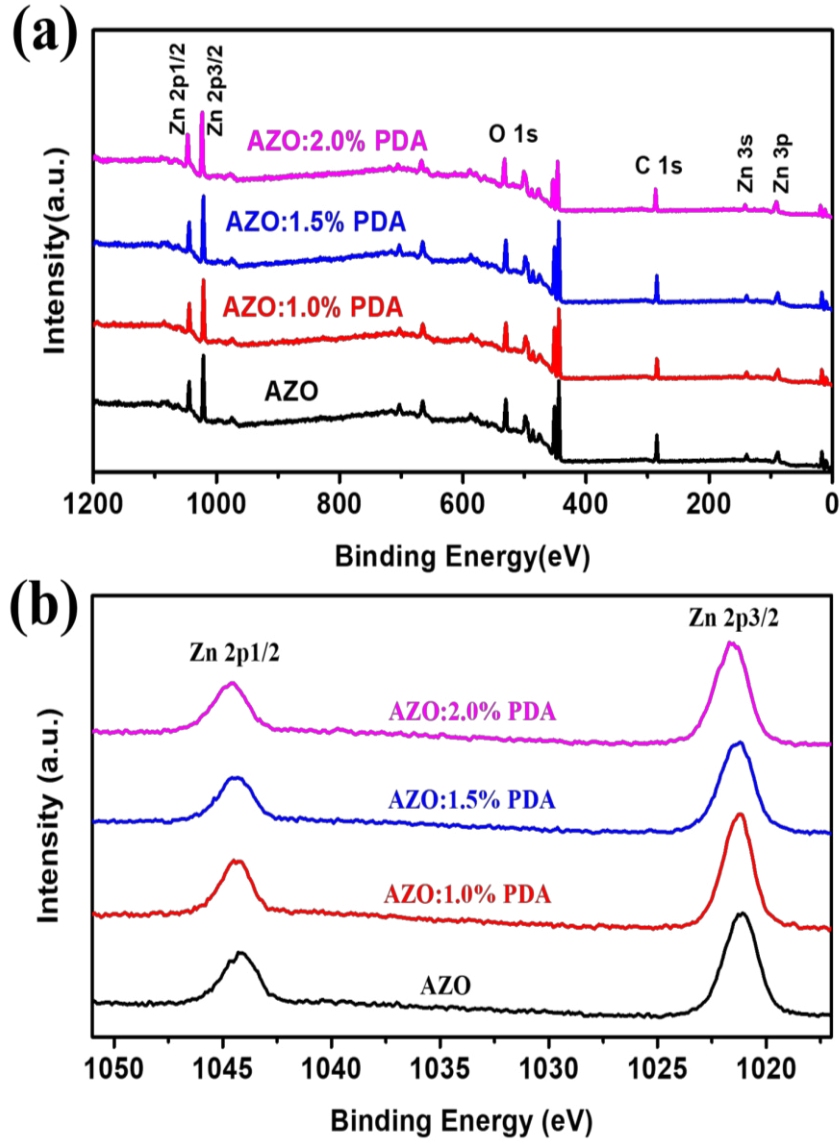

**Figure S2.** (a) XPS spectra of AZO, AZO:1.0%PDA, AZO:1.5%PDA and AZO:2.0%PDA. (b) Zn 2p of AZO, AZO:1.0% PDA, AZO:1.5%PDA and AZO:2.0%PDA.



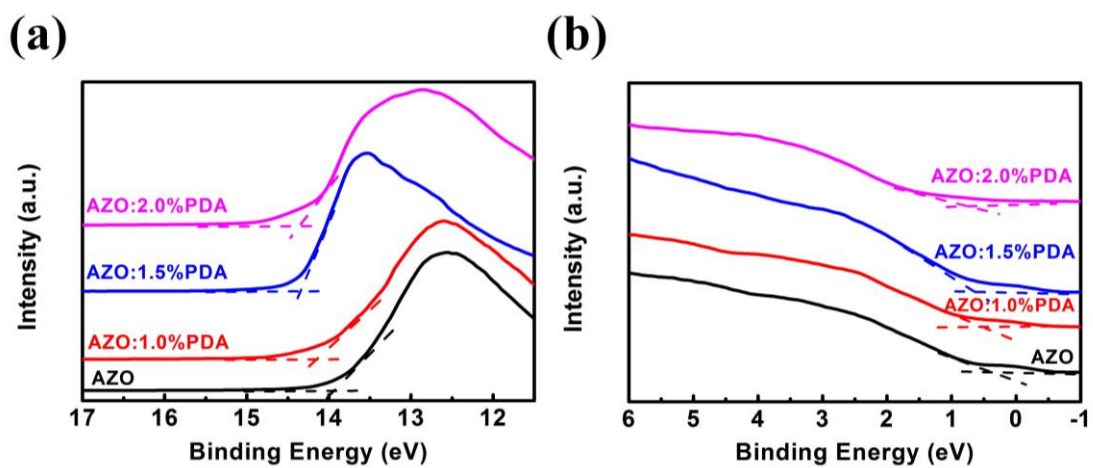

**Figure S3.** (a) Ultraviolet photoelectron spectroscopy (UPS) results of the corresponding energy range near the secondary electron cutoff and (b) Fermi/the highest occupied molecular orbital (HOMO) level.

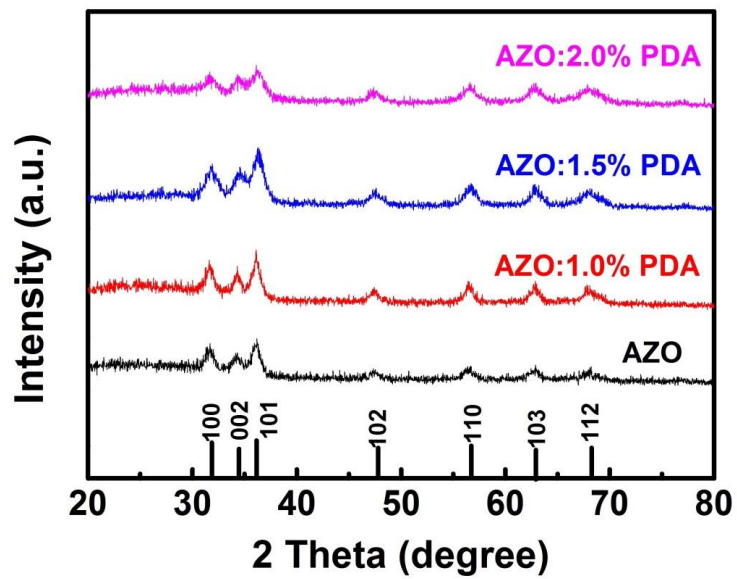

**Figure S4.** X-ray diffraction (XRD) patterns of AZO, AZO:1.0%PDA, AZO:1.5%PDA and AZO:2.0%PDA.

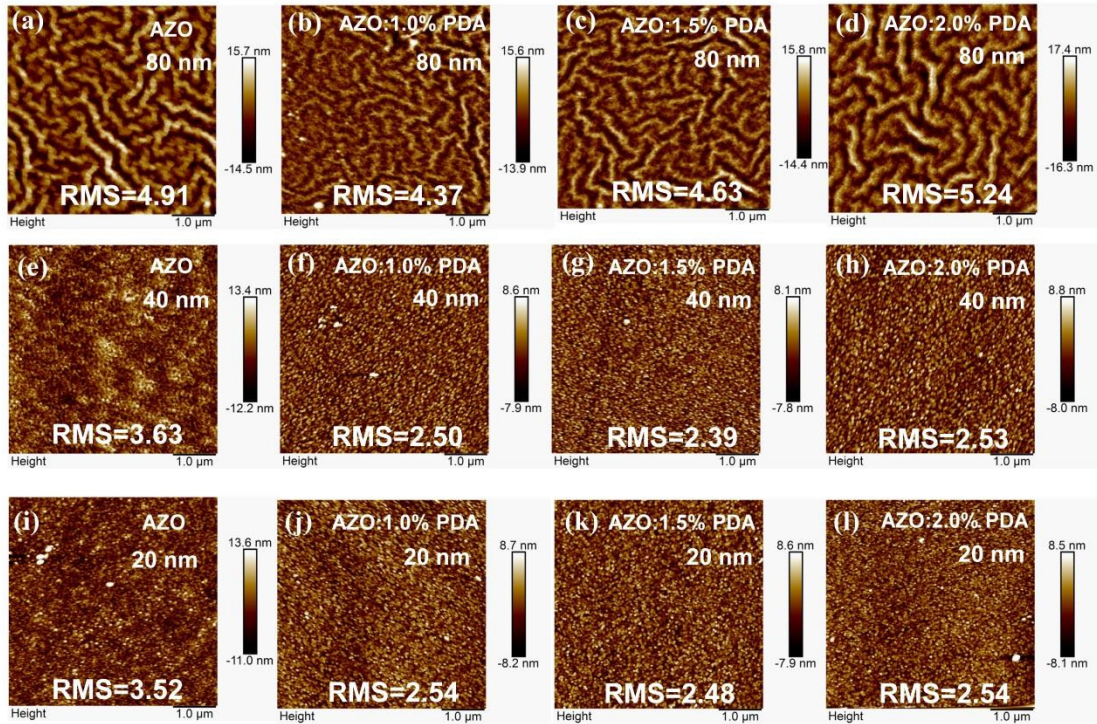

**Figure S5.** Atomic force microscopy (AFM) surface plot images ( $5 \mu\text{m} \times 5 \mu\text{m}$ ) of AZO, AZO:1.0%PDA, AZO:1.5%PDA and AZO:2.0%PDA films: (a-d)  $\sim 80$  nm, (e-h)  $\sim 40$  nm and (i-l)  $\sim 20$  nm, respectively.

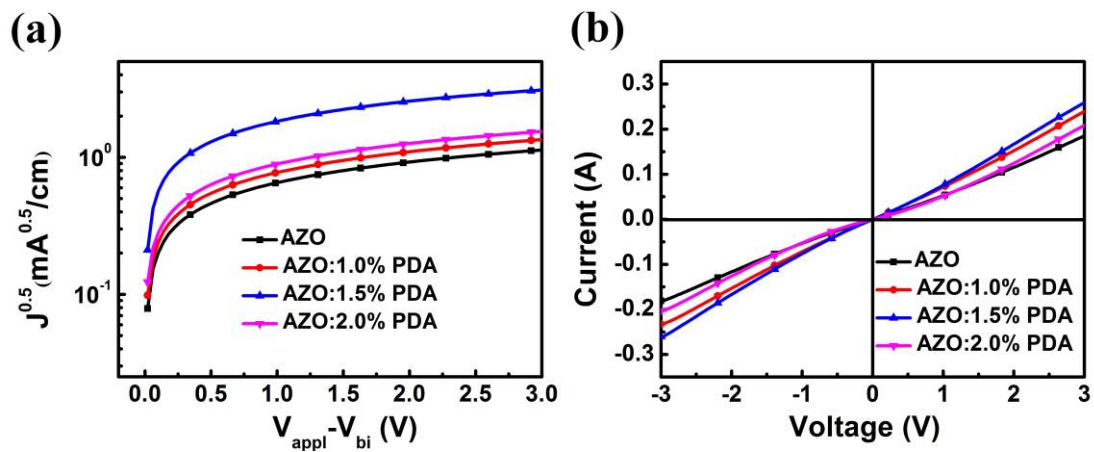

**Figure S6.** (a) Current density<sup>0.5</sup>-voltage ( $J^{0.5}$ -V) curves of electron-only devices based on ITO/AZO ETLs/PBDB-T:ITIC/Al, (b) J-V curves of ITO/AZO ETLs/Al.

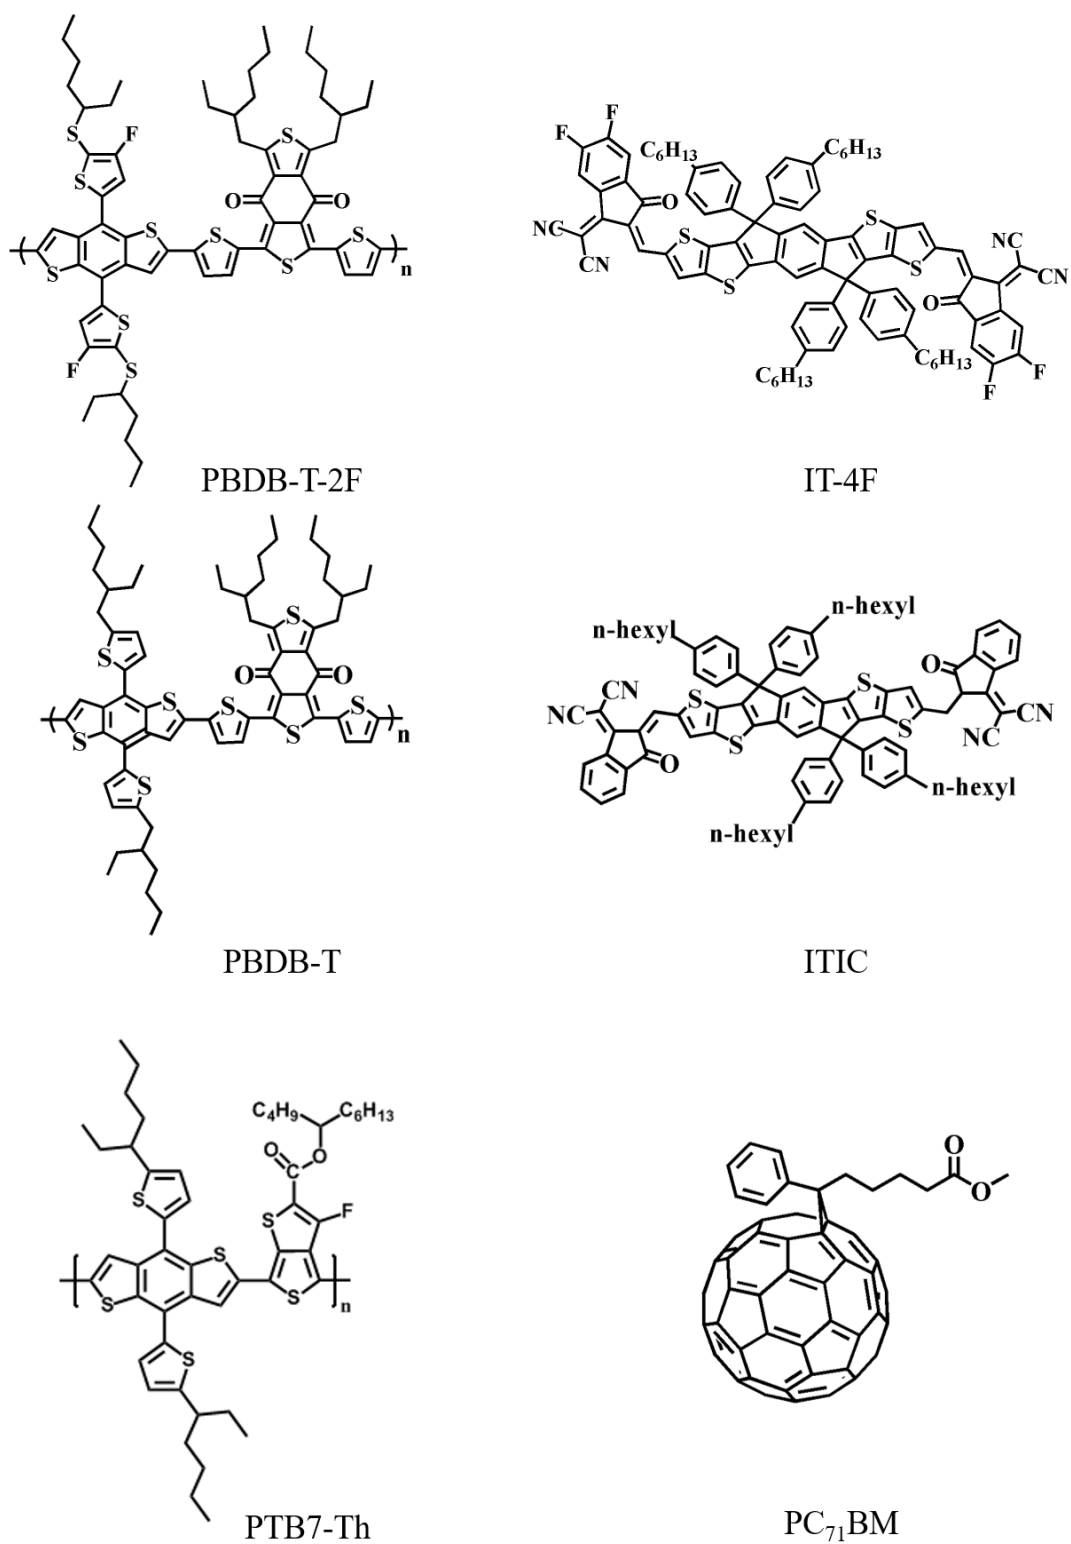

**Figure S7.** The molecular structures of the active layer materials.

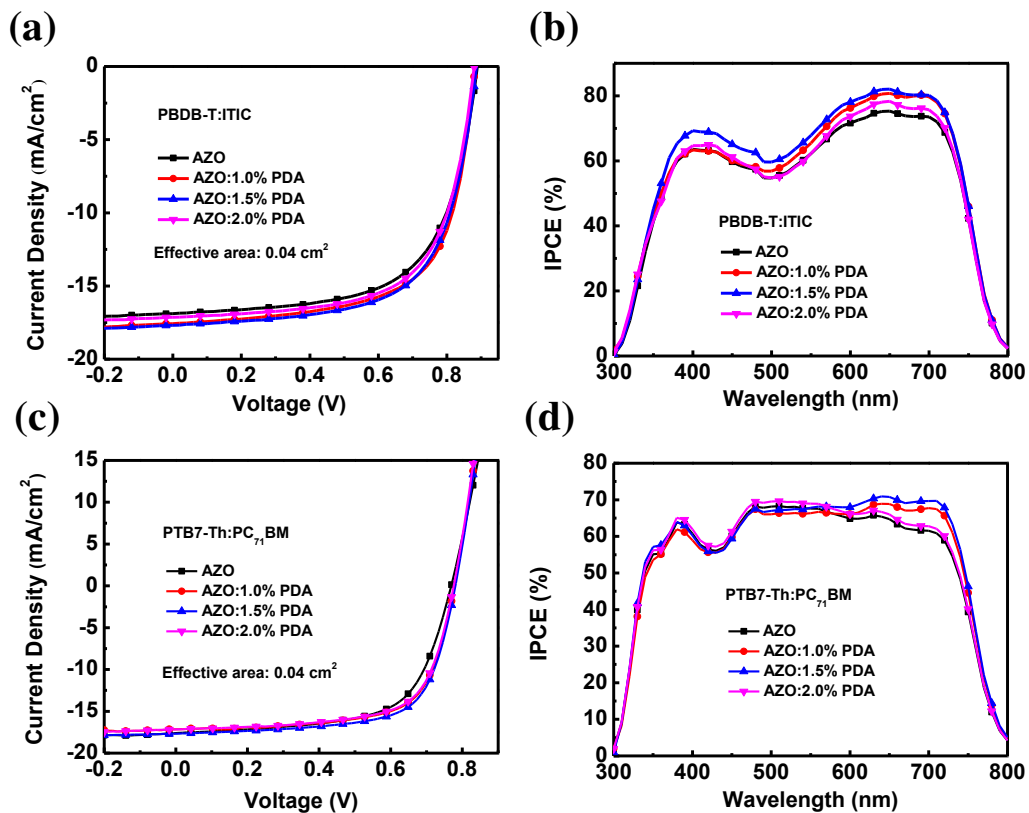

**Figure S8.** (a, c) The current density-voltage (J-V) curves and (b, d) incident photon-to-current efficiency (IPCE) spectra of the inverted PSCs based on ITO/ETLs/PBDB-T:ITIC/MoO<sub>3</sub>/Ag and ITO/ETLs/PTB7-Th:PC<sub>71</sub>BM/MoO<sub>3</sub>/Ag, respectively.

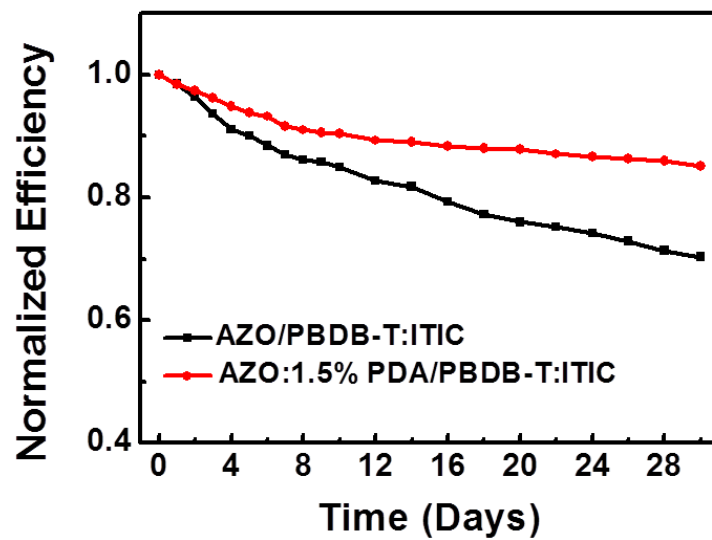

**Figure S9.** Comparison of the average power conversion efficiency (PCE) stability of AZO/PBDB-T:ITIC and AZO:1.5%PDA/PBDB-T:ITIC based PSCs without encapsulation.

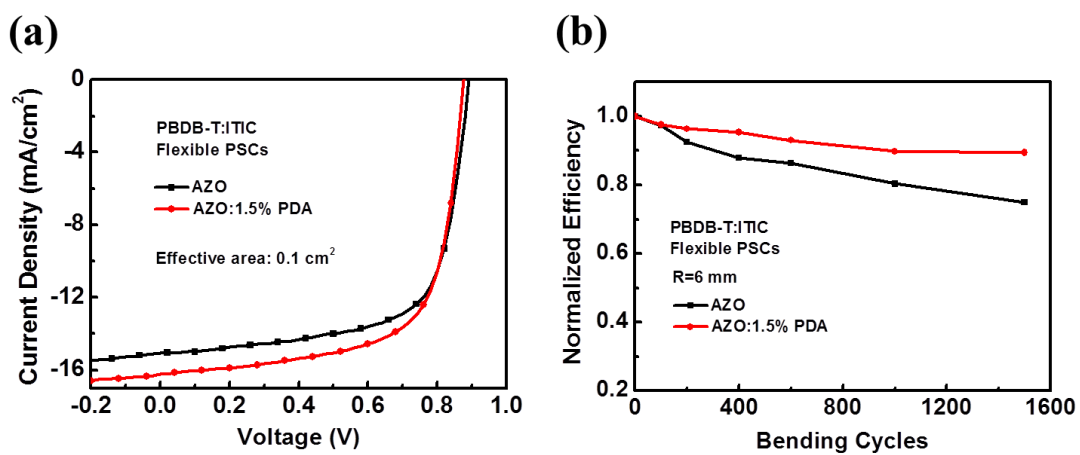

**Figure S10.** (a) J-V curves of flexible devices based on PET/Ag-mesh/PH1000/PEIE/AZO ETLs/PBDB-T-2F:IT-4F/MoO<sub>3</sub>/Al. (b) Normalized average PCE of flexible PSCs as a function of bending cycles with radius of 6 mm.



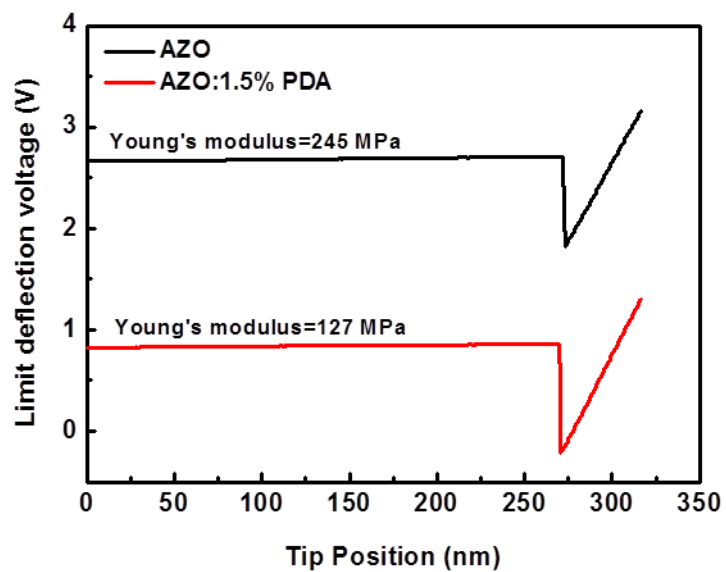

**Figure S11.** Young's model measured by peak-force model of atomic force microscopy (AFM) of AZO and AZO:1.5%PDA.

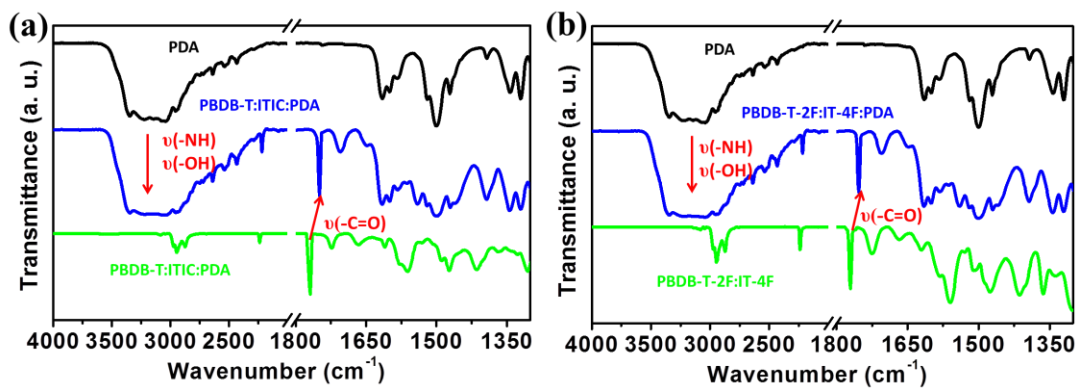

**Figure S12.** Fourier transform infrared spectroscopy (FTIR) spectra of a) PDA, PBDB-T:ITIC:PDA and PBDB-T:ITIC. b) PDA, PBDB-T-2F:IT-4F:PDA and PBDB-T-2F:IT-4F.

**Table S1.** Electron mobility of devices based on ITO/AZO ETLs/PBDB-T:ITIC/Al.

| ETLs                                                                     | AZO                  | AZO:1.0%PDA          | AZO:1.5%PDA          | AZO:2.0%PDA          |
|--------------------------------------------------------------------------|----------------------|----------------------|----------------------|----------------------|
| Electron mobility<br>[cm <sup>-2</sup> V <sup>-1</sup> s <sup>-1</sup> ] | 6.1×10 <sup>-4</sup> | 8.2×10 <sup>-4</sup> | 4.2×10 <sup>-3</sup> | 1.1×10 <sup>-3</sup> |

**Table S2.** Conductivity of devices based on ITO/AZO ETLs/Al.

| ETLs                  | AZO                   | AZO:1.0%PDA           | AZO:1.5%PDA           | AZO:2.0%PDA           |
|-----------------------|-----------------------|-----------------------|-----------------------|-----------------------|
| Conductivity<br>[S/m] | $1.18 \times 10^{-3}$ | $1.54 \times 10^{-3}$ | $1.68 \times 10^{-3}$ | $1.28 \times 10^{-3}$ |

**Table S3.** Device parameters of inverted PSCs based on PBDB-T:ITIC and PTB7-Th:PC<sub>71</sub>BM blend with AZO and bendable AZO ETLs under AM 1.5G irradiation (100 mW cm<sup>-2</sup>).

| ETLs        | BHJ                         | J <sub>sc</sub><br>(mA/cm <sup>2</sup> ) | V <sub>oc</sub><br>(V) | FF<br>(%) | PCE<br>(%)                   |
|-------------|-----------------------------|------------------------------------------|------------------------|-----------|------------------------------|
| AZO         | PBDB-T:ITIC                 | 16.81±0.18                               | 0.880±0.002            | 62.5±1.2  | 9.5±0.2 (9.7) <sup>a</sup>   |
| AZO:1.0%PDA | PBDB-T:ITIC                 | 17.41±0.17                               | 0.880±0.002            | 64.3±1.4  | 10.0±0.1 (10.1) <sup>a</sup> |
| AZO:1.5%PDA | PBDB-T:ITIC                 | 17.54±0.14                               | 0.882±0.004            | 64.3±1.0  | 10.1±0.2 (10.3) <sup>a</sup> |
| AZO:2.0%PDA | PBDB-T:ITIC                 | 16.98±0.15                               | 0.881±0.002            | 64.2±1.0  | 9.9±0.1 (10.0) <sup>a</sup>  |
| AZO         | PTB7-Th:PC <sub>71</sub> BM | 17.33±0.17                               | 0.770±0.004            | 64.1±1.2  | 8.6±0.1 (8.7) <sup>a</sup>   |
| AZO:1.0%PDA | PTB7-Th:PC <sub>71</sub> BM | 17.35±0.19                               | 0.780±0.004            | 70.1±1.2  | 9.0±0.1 (9.1) <sup>a</sup>   |
| AZO:1.5%PDA | PTB7-Th:PC <sub>71</sub> BM | 17.53±0.14                               | 0.780±0.003            | 70.4±1.1  | 9.5±0.1 (9.6) <sup>a</sup>   |
| AZO:2.0%PDA | PTB7-Th:PC <sub>71</sub> BM | 17.32±0.18                               | 0.780±0.003            | 69.4±1.1  | 8.9±0.1 (9.0) <sup>a</sup>   |

The device effective area is 0.04 cm<sup>2</sup> of a single chip; all the values represent averages from twelve devices on a single chip.

The device structure is ITO/AZO ETLs/Active layer/MoO<sub>3</sub>/Ag.

<sup>a</sup> The best PCE value.

**Table S4.** The decay of PCE for inverted PSCs based on PBDB-T-2F:IT-4F and PBDB-T:ITIC after bending test.

| ETLs        | Bending cycles | 0    | 100  | 200  | 400  | 600  | 1000 | 1500 | BHJ             |
|-------------|----------------|------|------|------|------|------|------|------|-----------------|
|             | PCE(%)         |      |      |      |      |      |      |      |                 |
| AZO         |                | 11.2 | 10.6 | 10.2 | 10.0 | 9.0  | 8.5  | 8.3  | PBDB-T-2F:IT-4F |
| AZO:1.5%PDA |                | 11.5 | 11.3 | 11.1 | 11.1 | 10.8 | 10.6 | 10.3 |                 |
| AZO         |                | 9.2  | 8.9  | 8.5  | 8.0  | 7.9  | 7.4  | 6.9  | PBDB-T:ITIC     |
| AZO:1.5%PDA |                | 9.6  | 9.4  | 9.3  | 9.2  | 8.9  | 8.6  | 8.6  |                 |

**Movie S1.** The video shows the 3M tape peeling test of ITO/AZO:1.5% PDA/PTB7-Th:PC<sub>71</sub>BM after 10 times.

**Movie S2.** The video shows the 3M tape peeling test of ITO/AZO/PTB7-Th:PC<sub>71</sub>BM after 5 times.

**Movie S3.** The video shows the 3M tape peeling test of ITO/AZO:1.5% PDA/PBDB-T:ITIC after 10 times.

**Movie S4.** The video shows the 3M tape peeling test of ITO/AZO/PBDB-T:ITIC after 5 times.
